# Supplementary material for: Humoral Immune Response after COVID-19 mRNA Vaccination in Patients with Liver Cirrhosis: A Prospective Real-Life Single Center Study
Source: MDPI journal article supplement (doi:10.3390/biomedicines11051320), 2023-04-28
Supplement: s1 [file s1]

|           | Category           | Coefficient (95% CI)        | P            |
|-----------|--------------------|-----------------------------|--------------|
| Sex       | Male vs. Female    | <b>-0.27 (-0.47, -0.08)</b> | <b>0.008</b> |
| Age       | Continuous         | -0.01 (-0.02, 0)            | 0.0559       |
| Cirrhosis | Yes vs. No         | -0.39 (-1.71, 0.54)         | 0.4872       |
| Vaccine   | Moderna vs. Pfizer | 0.92 (-0.01, 2.25)          | 0.0978       |
